# Supplementary material for: Haplotype diversity and sequence heterogeneity of human telomeres
Source: PubMed Central journal article supplement — Genome Res. 2021 Jul;31(7):1269–79. doi: 10.1101/gr.274639.120 (PMC8256856; doi:10.1101/gr.274639.120), 2021-07

**Supplemental Figure S2.** Densities of the top two enriched motifs at ends of chromosomal *p* arms of datasets (A) HG001, (B) HG003, (C) HG004, (D) HG005, (E) HG006, and (F) HG007. Only the arms covered by at least 25 reads across all datasets are displayed. Genomic coordinates are given in kbp. Vertical red dashed lines denote the position of the boundary of the annotated telomeric tract.

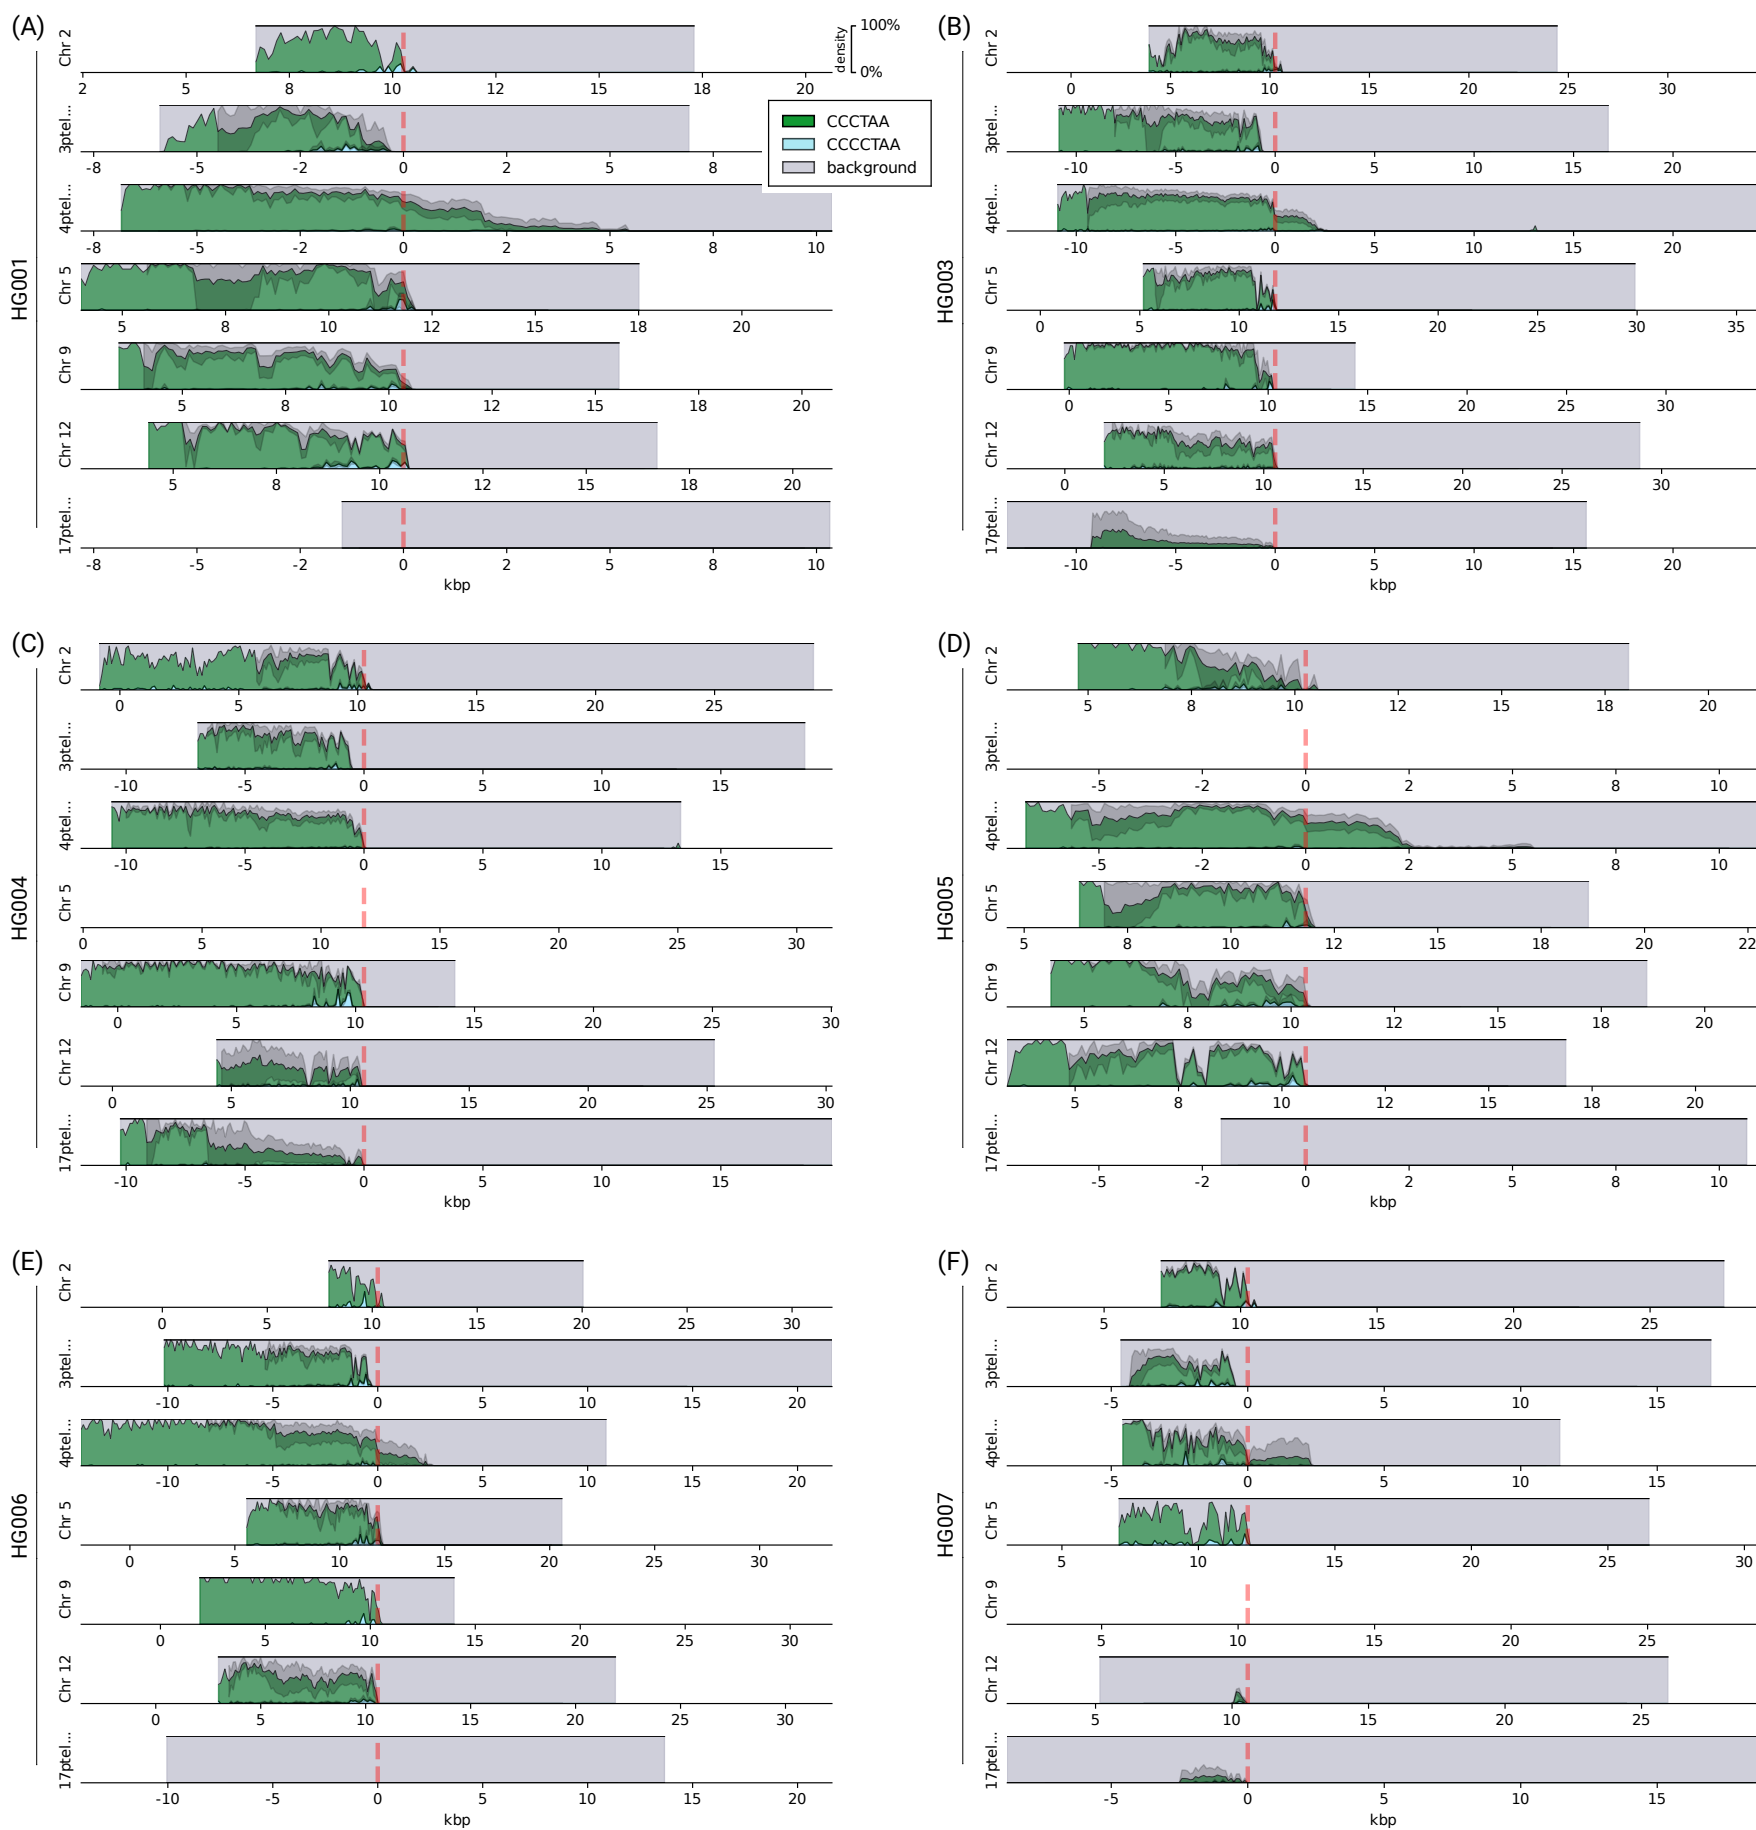

Supplement: supp_gr.274639.120_Supplemental_Fig_S2.pdf [file supp_gr.274639.120_Supplemental_Fig_S2.pdf]
