# Supplementary material for: Haplotype diversity and sequence heterogeneity of human telomeres
Source: PubMed Central journal article supplement — Genome Res. 2021 Jul;31(7):1269–79. doi: 10.1101/gr.274639.120 (PMC8256856; doi:10.1101/gr.274639.120), 2021-07

**Supplemental Figure S5.** Clustering of reads on each chromosomal *q* arm by pairwise Levenshtein distance, for each subject (HG001 through HG007), and densities of the top three enriched motifs along each read in the telomeric region. Genomic coordinates are given in kbp, relative to the boundary of the annotated telomeric tract.

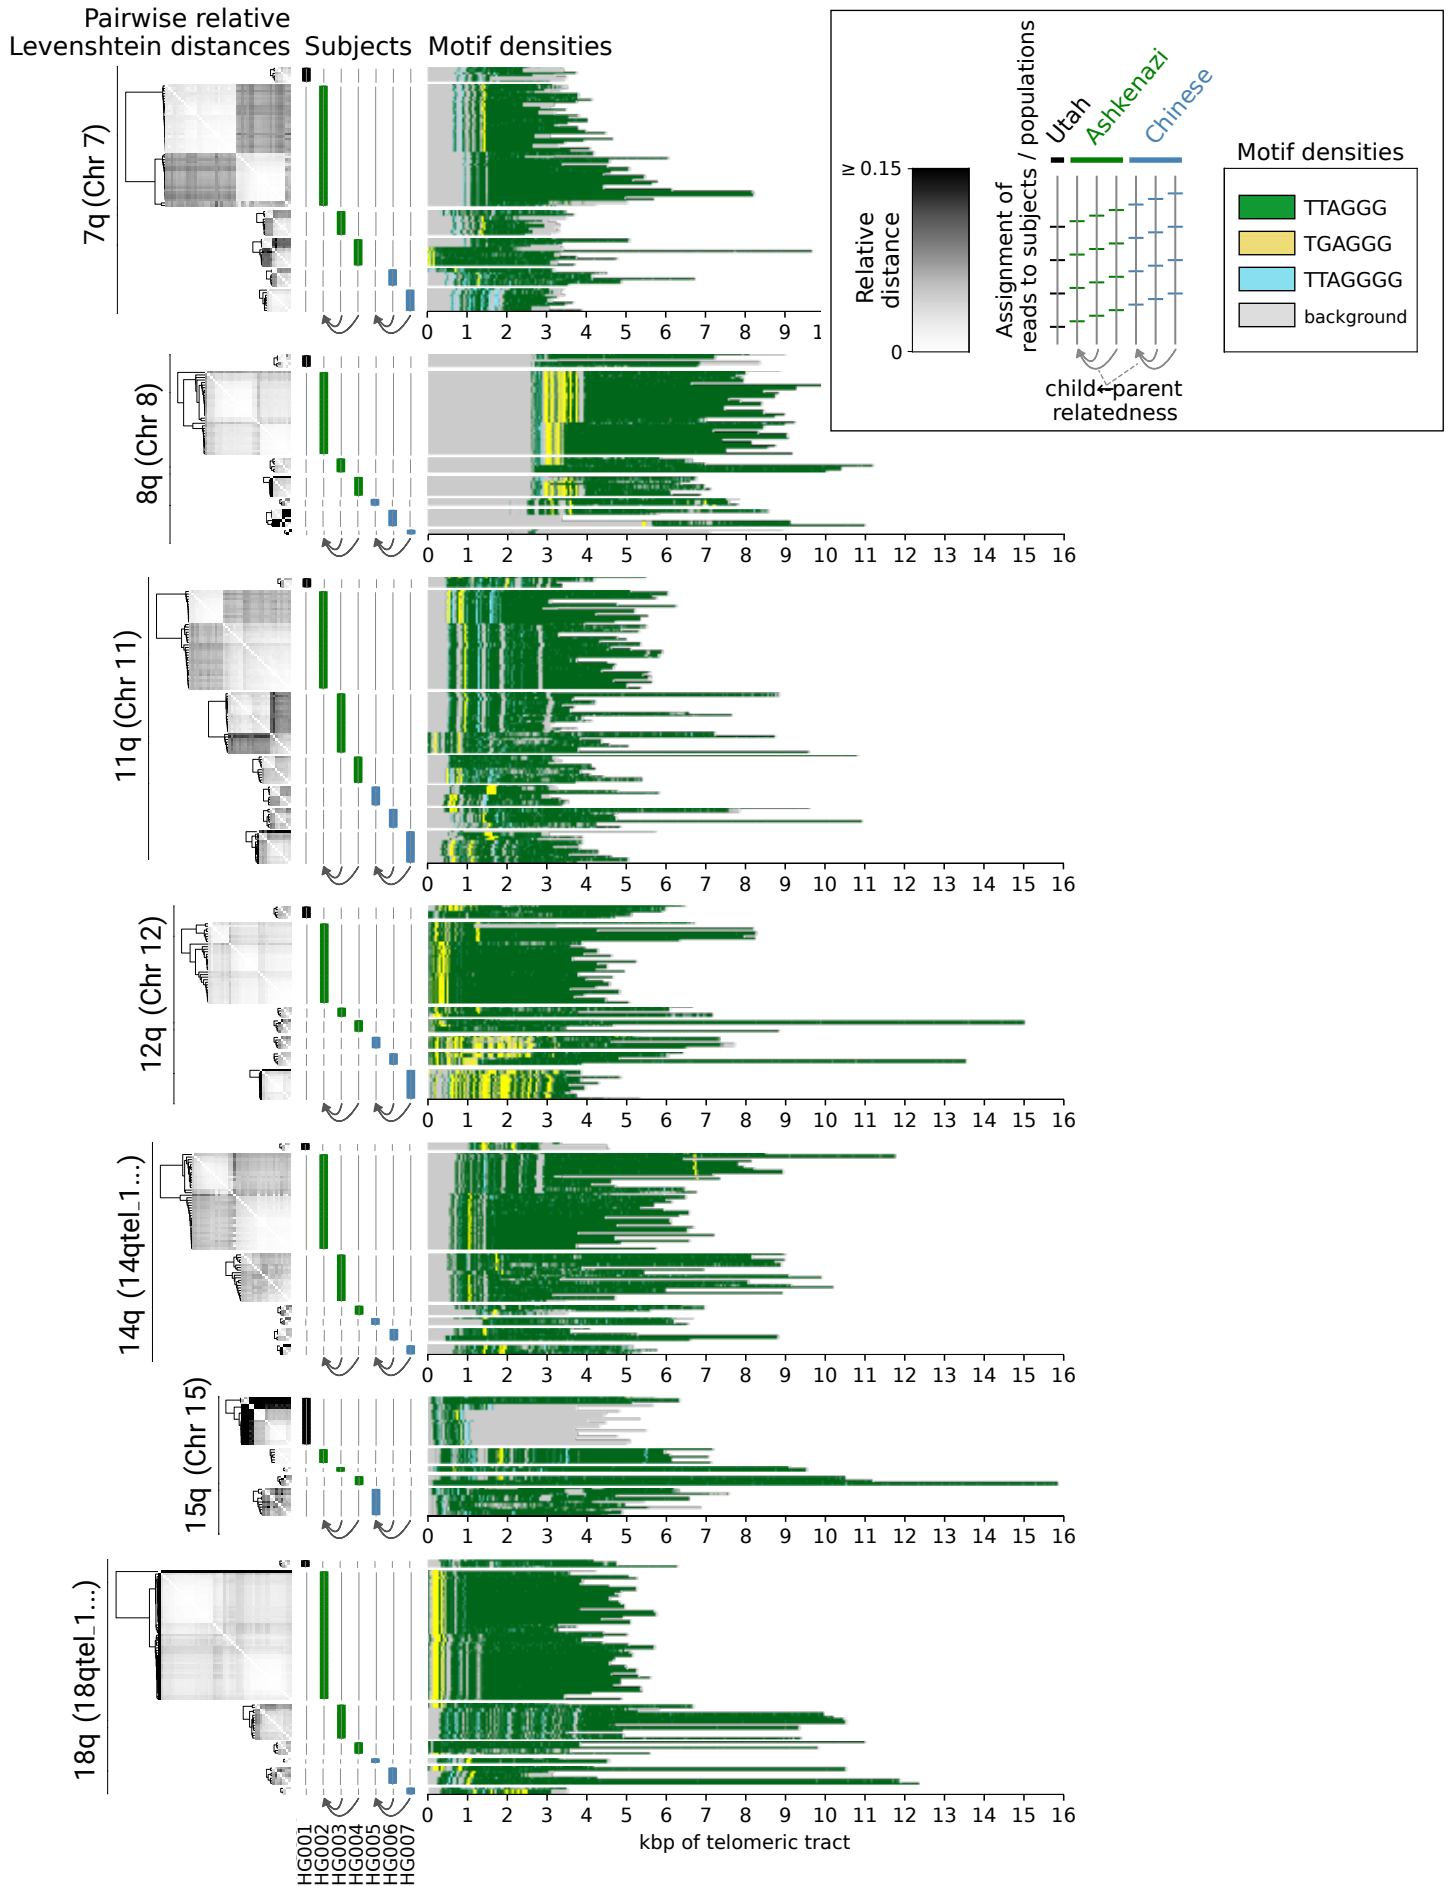

Supplement: supp_gr.274639.120_Supplemental_Fig_S5.pdf [file supp_gr.274639.120_Supplemental_Fig_S5.pdf]
